# Supplementary material
Source: publisher figshare collection journal article supplement (https://acs.figshare.com/ndownloader/files/5198923)
Supplement: Supplementary file 1 [file 5198923]

#===================================================================
data_c:\xray\h739\work\h739m
#===================================================================

# 1. SUBMISSION DETAILS

_publ_contact_author_name     ' Professor Hua-Fen Hsu'
_publ_contact_author_address
;
Department of Chemistry
National Cheng Kung University
Tainan 701
Taiwan
;
_publ_contact_author_email     konopka@mail.ncku.edu.tw
_publ_contact_author_fax     '886-6-2757575 ext 65336'
_publ_contact_author_phone     '886-6-2740552'
_publ_requested_journal           'Inorganic Chemistry'
_publ_requested_coeditor_name   ?
_publ_contact_letter
;
September 10, 2001

Please consider this CIF submission for publication in Inorganic Chemistry.
All authors have seen and approved of this submission.

Hua-Fen Hsu
;

#======================================================================

# 2. PROCESSING SUMMARY (IUCr Office Use Only)

_journal_date_recd_electronic     ?

_journal_date_to_coeditor         ?
_journal_date_from_coeditor       ?
_journal_date_accepted            ?

_journal_date_printers_first      ?
_journal_date_printers_final      ?
_journal_date_proofs_out          ?
_journal_date_proofs_in           ?

_journal_coeditor_name            ?
_journal_coeditor_code            ?
_journal_coeditor_notes
; ?
;

_journal_techeditor_code          ?
_journal_techeditor_notes
; ?
;

_journal_coden_ASTM               ?
_journal_name_full                ?
_journal_year                     ?
_journal_volume                   ?
_journal_issue                    ?
_journal_page_first               ?
_journal_page_last                ?

_journal_suppl_publ_number        ?
_journal_suppl_publ_pages         ?

#=======================================================================

# 3. TITLE AND AUTHOR LIST

_publ_section_title
;
The First Example of a Seven-coordinate Vanadium(III) Thiolate
Complex Containing the Hydrazine Molecule, an Intermediate of
Nitrogen Fixation
;
loop_
      _publ_author_name
      _publ_author_address
      'Hua-Fen Hsu'
;
Department of Chemistry
National Cheng Kung University
Tainan, 701
Taiwan
;
      'Wei-Cheng Chu'
;
Department of Chemistry
National Cheng Kung University
Tainan, 701
Taiwan
;
      'Chen-Hsiung Hung'
;
Department of Chemistry
National Changhua University of Education
Changhua
Taiwan
;
      'Ju-Hsiou Liao'
;
Department of Chemistry
National Chung Cheng University
160 San-Hsing, Min-Hsiung, Chia-Yi 621
Taiwan
;

#=======================================================================
_audit_creation_method            SHELXL-97
_chemical_name_systematic
;
   ?
;
_chemical_name_common             ?
_chemical_melting_point           ?
_chemical_formula_moiety          ?
_chemical_formula_sum
   'C39 H72 N6 O3 P S3 Si3 V'
_chemical_formula_weight          935.39

loop_
   _atom_type_symbol
   _atom_type_description
   _atom_type_scat_dispersion_real
   _atom_type_scat_dispersion_imag
   _atom_type_scat_source
   'V'  'V'   0.3005   0.5294
   'International Tables Vol C Tables 4.2.6.8 and 6.1.1.4'
   'N'  'N'   0.0061   0.0033
   'International Tables Vol C Tables 4.2.6.8 and 6.1.1.4'
   'H'  'H'   0.0000   0.0000
   'International Tables Vol C Tables 4.2.6.8 and 6.1.1.4'
   'O'  'O'   0.0106   0.0060
   'International Tables Vol C Tables 4.2.6.8 and 6.1.1.4'
   'P'  'P'   0.1023   0.0942
   'International Tables Vol C Tables 4.2.6.8 and 6.1.1.4'
   'S'  'S'   0.1246   0.1234
   'International Tables Vol C Tables 4.2.6.8 and 6.1.1.4'
   'Si'  'Si'   0.0817   0.0704
   'International Tables Vol C Tables 4.2.6.8 and 6.1.1.4'
   'C'  'C'   0.0033   0.0016
   'International Tables Vol C Tables 4.2.6.8 and 6.1.1.4'

_symmetry_cell_setting            Triclinic
_symmetry_space_group_name_H-M    P-1

loop_
   _symmetry_equiv_pos_as_xyz
   'x, y, z'
   '-x, -y, -z'

_cell_length_a                    11.2441(10)
_cell_length_b                    11.2607(10)
_cell_length_c                    19.5312(17)
_cell_angle_alpha                 86.032(2)
_cell_angle_beta                  88.291(2)
_cell_angle_gamma                 75.138(2)
_cell_volume                      2384.3(4)
_cell_formula_units_Z             2
_cell_measurement_temperature     150(2)
_cell_measurement_reflns_used     ?
_cell_measurement_theta_min       ?
_cell_measurement_theta_max       ?

_exptl_crystal_description        Plate
_exptl_crystal_colour             Green
_exptl_crystal_size_max           0.35
_exptl_crystal_size_mid           0.20
_exptl_crystal_size_min           0.11
_exptl_crystal_density_meas       ?
_exptl_crystal_density_diffrn     1.303
_exptl_crystal_density_method     'not measured'
_exptl_crystal_F_000              1000
_exptl_absorpt_coefficient_mu     0.490
_exptl_absorpt_correction_type    'Empirical Used SADABS'
_exptl_absorpt_correction_T_min   0.8471
_exptl_absorpt_correction_T_max   0.9480
_exptl_absorpt_process_details    ?

_exptl_special_details
;
   ?
;

_diffrn_ambient_temperature       150(2)
_diffrn_radiation_wavelength      0.71073
_diffrn_radiation_type            MoK\a
_diffrn_radiation_source          'fine-focus sealed tube'
_diffrn_radiation_monochromator   graphite
_diffrn_measurement_device_type   'CCD area detector'
_diffrn_measurement_method        'phi and omega scans'
_diffrn_detector_area_resol_mean  ?
_diffrn_standards_number          ?
_diffrn_standards_interval_count  ?
_diffrn_standards_interval_time   ?
_diffrn_standards_decay_%         ?
_diffrn_reflns_number             15187
_diffrn_reflns_av_R_equivalents   0.0512
_diffrn_reflns_av_sigmaI/netI     0.1891
_diffrn_reflns_limit_h_min        -14
_diffrn_reflns_limit_h_max        14
_diffrn_reflns_limit_k_min        -14
_diffrn_reflns_limit_k_max        9
_diffrn_reflns_limit_l_min        -25
_diffrn_reflns_limit_l_max        24
_diffrn_reflns_theta_min          1.05
_diffrn_reflns_theta_max          27.53
_reflns_number_total              10574
_reflns_number_gt                 4909
_reflns_threshold_expression      >2sigma(I)

_computing_data_collection        'Bruker SMART'
_computing_cell_refinement        'Bruker SMART'
_computing_data_reduction         'Bruker SHELXTL'
_computing_structure_solution     'SHELXS-97 (Sheldrick, 1990)'
_computing_structure_refinement   'SHELXL-97 (Sheldrick, 1997)'
_computing_molecular_graphics     'Bruker SHELXTL'
_computing_publication_material   'Bruker SHELXTL'

_refine_special_details
;
   Refinement of F^2^ against ALL reflections.  The weighted R-factor wR and
   goodness of fit S are based on F^2^, conventional R-factors R are based
   on F, with F set to zero for negative F^2^. The threshold expression of
   F^2^ > 2sigma(F^2^) is used only for calculating R-factors(gt) etc. and is
   not relevant to the choice of reflections for refinement.  R-factors based
   on F^2^ are statistically about twice as large as those based on F, and R-
   factors based on ALL data will be even larger.
;

_refine_ls_structure_factor_coef  Fsqd
_refine_ls_matrix_type            full
_refine_ls_weighting_scheme       calc
_refine_ls_weighting_details
   'calc w=1/[\s^2^(Fo^2^)+(0.0319P)^2^+0.0000P] where P=(Fo^2^+2Fc^2^)/3'
_atom_sites_solution_primary      direct
_atom_sites_solution_secondary    difmap
_atom_sites_solution_hydrogens    geom
_refine_ls_hydrogen_treatment     mixed
_refine_ls_extinction_method      none
_refine_ls_extinction_coef        ?
_refine_ls_number_reflns          10574
_refine_ls_number_parameters      510
_refine_ls_number_restraints      0
_refine_ls_R_factor_all           0.1214
_refine_ls_R_factor_gt            0.0563
_refine_ls_wR_factor_ref          0.1514
_refine_ls_wR_factor_gt           0.1136
_refine_ls_goodness_of_fit_ref    1.029
_refine_ls_restrained_S_all       1.029
_refine_ls_shift/su_max           0.036
_refine_ls_shift/su_mean          0.000

loop_
   _atom_site_label
   _atom_site_type_symbol
   _atom_site_fract_x
   _atom_site_fract_y
   _atom_site_fract_z
   _atom_site_U_iso_or_equiv
   _atom_site_adp_type
   _atom_site_occupancy
   _atom_site_symmetry_multiplicity
   _atom_site_calc_flag
   _atom_site_refinement_flags
   _atom_site_disorder_assembly
   _atom_site_disorder_group
V1 V 1.04500(7) -0.03688(8) 0.30504(4) 0.0170(2) Uani 1 1 d . . .
N1 N 1.1940(3) -0.0214(4) 0.37420(19) 0.0229(10) Uani 1 1 d . . .
H1D H 1.2522 -0.0957 0.3764 0.034 Uiso 1 1 calc R . .
H1E H 1.2312 0.0362 0.3538 0.034 Uiso 1 1 calc R . .
N2 N 1.1611(4) 0.0113(4) 0.4431(2) 0.0303(11) Uani 1 1 d . . .
H2NB H 1.2169 0.0236 0.4606 0.045 Uiso 1 1 calc R . .
H2NA H 1.1050 0.0956 0.4333 0.045 Uiso 1 1 d R . .
N3 N 1.1561(3) -0.2292(4) 0.2985(2) 0.0252(11) Uani 1 1 d . . .
H3D H 1.1206 -0.2786 0.3274 0.038 Uiso 1 1 calc R . .
H3E H 1.1497 -0.2514 0.2545 0.038 Uiso 1 1 calc R . .
N4 N 1.2882(3) -0.2579(4) 0.3148(2) 0.0280(11) Uani 1 1 d . . .
H4NA H 1.3179 -0.2115 0.2947 0.042 Uiso 1 1 calc R . .
H4NB H 1.3046 -0.3410 0.2966 0.042 Uiso 1 1 d R . .
N5 N 0.9801(4) -0.1124(4) 0.40359(19) 0.0242(11) Uani 1 1 d . . .
H5A H 1.0229 -0.0914 0.4383 0.036 Uiso 1 1 calc R . .
H5B H 0.8988 -0.0715 0.4094 0.036 Uiso 1 1 calc R . .
N6 N 0.9887(4) -0.2435(4) 0.4143(2) 0.0283(11) Uani 1 1 d . . .
H6NB H 0.9579 -0.2561 0.4488 0.042 Uiso 1 1 calc R . .
H6NA H 0.9507 -0.2519 0.3755 0.042 Uiso 1 1 d R . .
O1 O 0.7001(3) 0.9435(4) 0.43424(18) 0.0350(10) Uani 1 1 d . . .
O2 O 0.2989(4) 0.4722(4) 0.3158(2) 0.0544(13) Uani 1 1 d . . .
O3 O 0.2095(4) 0.6652(4) 0.15670(18) 0.0424(11) Uani 1 1 d . . .
P1 P 0.94339(11) 0.09336(13) 0.21066(7) 0.0181(3) Uani 1 1 d . . .
S1 S 1.20934(11) -0.01439(13) 0.21914(7) 0.0256(3) Uani 1 1 d . . .
S2 S 0.93902(12) 0.16103(13) 0.35645(6) 0.0236(3) Uani 1 1 d . . .
S3 S 0.87769(11) -0.12614(13) 0.26816(6) 0.0213(3) Uani 1 1 d . . .
Si1 Si 1.42056(13) 0.10329(15) 0.12780(7) 0.0231(4) Uani 1 1 d . . .
Si2 Si 0.72450(14) 0.40730(15) 0.41559(8) 0.0268(4) Uani 1 1 d . . .
Si3 Si 0.76921(13) -0.31784(15) 0.17290(7) 0.0249(4) Uani 1 1 d . . .
C1 C 1.4943(5) 0.0746(5) 0.2111(3) 0.0326(14) Uani 1 1 d . . .
H1A H 1.4563 0.0200 0.2405 0.049 Uiso 1 1 calc R . .
H1B H 1.4842 0.1528 0.2326 0.049 Uiso 1 1 calc R . .
H1C H 1.5822 0.0355 0.2052 0.049 Uiso 1 1 calc R . .
C2 C 1.4956(4) 0.2083(5) 0.0738(2) 0.0301(14) Uani 1 1 d . . .
H2A H 1.4664 0.2923 0.0887 0.045 Uiso 1 1 calc R . .
H2B H 1.4745 0.2071 0.0255 0.045 Uiso 1 1 calc R . .
H2C H 1.5851 0.1803 0.0788 0.045 Uiso 1 1 calc R . .
C3 C 1.4437(4) -0.0443(5) 0.0863(2) 0.0250(13) Uani 1 1 d . . .
H3A H 1.5320 -0.0824 0.0815 0.037 Uiso 1 1 calc R . .
H3B H 1.4061 -0.0287 0.0408 0.037 Uiso 1 1 calc R . .
H3C H 1.4052 -0.0998 0.1146 0.037 Uiso 1 1 calc R . .
C4 C 1.2510(4) 0.1799(5) 0.1321(2) 0.0233(13) Uani 1 1 d . . .
C5 C 1.2023(5) 0.2920(5) 0.0957(3) 0.0292(14) Uani 1 1 d . . .
H5 H 1.2578 0.3325 0.0726 0.035 Uiso 1 1 calc R . .
C6 C 1.0777(5) 0.3476(5) 0.0914(3) 0.0300(14) Uani 1 1 d . . .
H6 H 1.0497 0.4238 0.0655 0.036 Uiso 1 1 calc R . .
C7 C 0.9942(5) 0.2920(5) 0.1248(3) 0.0259(13) Uani 1 1 d . . .
H7 H 0.9084 0.3293 0.1220 0.031 Uiso 1 1 calc R . .
C8 C 1.0375(4) 0.1807(5) 0.1626(2) 0.0205(12) Uani 1 1 d . . .
C9 C 1.1643(4) 0.1252(5) 0.1680(2) 0.0215(12) Uani 1 1 d . . .
C10 C 0.5892(5) 0.5433(5) 0.4215(3) 0.0361(15) Uani 1 1 d . . .
H10A H 0.5161 0.5236 0.4041 0.054 Uiso 1 1 calc R . .
H10B H 0.6055 0.6137 0.3940 0.054 Uiso 1 1 calc R . .
H10C H 0.5751 0.5639 0.4695 0.054 Uiso 1 1 calc R . .
C11 C 0.7165(5) 0.2960(5) 0.4902(3) 0.0361(15) Uani 1 1 d . . .
H11A H 0.7195 0.3354 0.5331 0.054 Uiso 1 1 calc R . .
H11B H 0.7864 0.2234 0.4879 0.054 Uiso 1 1 calc R . .
H11C H 0.6394 0.2708 0.4887 0.054 Uiso 1 1 calc R . .
C12 C 0.8659(5) 0.4645(6) 0.4221(3) 0.0398(16) Uani 1 1 d . . .
H12A H 0.8668 0.5275 0.3851 0.060 Uiso 1 1 calc R . .
H12B H 0.9392 0.3958 0.4182 0.060 Uiso 1 1 calc R . .
H12C H 0.8658 0.5000 0.4665 0.060 Uiso 1 1 calc R . .
C13 C 0.7195(4) 0.3415(5) 0.3299(3) 0.0222(12) Uani 1 1 d . . .
C14 C 0.6213(4) 0.3919(5) 0.2835(3) 0.0228(12) Uani 1 1 d . . .
H14 H 0.5554 0.4562 0.2986 0.027 Uiso 1 1 calc R . .
C15 C 0.6151(5) 0.3546(5) 0.2191(3) 0.0278(14) Uani 1 1 d . . .
H15 H 0.5461 0.3922 0.1913 0.033 Uiso 1 1 calc R . .
C16 C 0.7100(4) 0.2613(5) 0.1938(3) 0.0220(12) Uani 1 1 d . . .
H16 H 0.7077 0.2345 0.1489 0.026 Uiso 1 1 calc R . .
C17 C 0.8086(4) 0.2089(5) 0.2375(2) 0.0209(12) Uani 1 1 d . . .
C18 C 0.8136(4) 0.2422(5) 0.3032(3) 0.0207(12) Uani 1 1 d . . .
C19 C 0.6319(4) -0.2731(5) 0.2310(2) 0.0312(14) Uani 1 1 d . . .
H19A H 0.6316 -0.3411 0.2652 0.047 Uiso 1 1 calc R . .
H19B H 0.5567 -0.2549 0.2040 0.047 Uiso 1 1 calc R . .
H19C H 0.6356 -0.2000 0.2545 0.047 Uiso 1 1 calc R . .
C20 C 0.8987(5) -0.4264(5) 0.2198(3) 0.0373(15) Uani 1 1 d . . .
H20A H 0.8944 -0.5111 0.2148 0.056 Uiso 1 1 calc R . .
H20B H 0.8929 -0.4097 0.2685 0.056 Uiso 1 1 calc R . .
H20C H 0.9771 -0.4154 0.2007 0.056 Uiso 1 1 calc R . .
C21 C 0.7259(5) -0.3951(5) 0.0998(3) 0.0381(15) Uani 1 1 d . . .
H21A H 0.7957 -0.4162 0.0678 0.057 Uiso 1 1 calc R . .
H21B H 0.6556 -0.3394 0.0760 0.057 Uiso 1 1 calc R . .
H21C H 0.7034 -0.4703 0.1171 0.057 Uiso 1 1 calc R . .
C22 C 0.8161(4) -0.1746(5) 0.1383(2) 0.0208(12) Uani 1 1 d . . .
C23 C 0.8078(4) -0.1450(5) 0.0652(2) 0.0218(12) Uani 1 1 d . . .
H23 H 0.7763 -0.1948 0.0369 0.026 Uiso 1 1 calc R . .
C24 C 0.8451(4) -0.0449(5) 0.0357(2) 0.0211(8) Uani 1 1 d . . .
H24 H 0.8423 -0.0286 -0.0127 0.025 Uiso 1 1 calc R . .
C25 C 0.8870(4) 0.0326(5) 0.0773(2) 0.0211(8) Uani 1 1 d . . .
H25A H 0.9110 0.1024 0.0573 0.025 Uiso 1 1 calc R . .
C26 C 0.8933(4) 0.0061(5) 0.1481(2) 0.0201(12) Uani 1 1 d . . .
C27 C 0.8601(4) -0.0989(5) 0.1773(2) 0.0189(12) Uani 1 1 d . . .
C28 C 0.6314(5) 1.0447(5) 0.3905(3) 0.0341(15) Uani 1 1 d . . .
H28A H 0.6582 1.0357 0.3419 0.041 Uiso 1 1 calc R . .
H28B H 0.6405 1.1244 0.4049 0.041 Uiso 1 1 calc R . .
C29 C 0.4996(5) 1.0342(6) 0.4008(3) 0.0374(16) Uani 1 1 d . . .
H29A H 0.4475 1.0750 0.3616 0.045 Uiso 1 1 calc R . .
H29B H 0.4630 1.0707 0.4437 0.045 Uiso 1 1 calc R . .
C30 C 0.5154(5) 0.8944(6) 0.4050(3) 0.0423(17) Uani 1 1 d . . .
H30A H 0.4983 0.8661 0.3603 0.051 Uiso 1 1 calc R . .
H30B H 0.4601 0.8698 0.4405 0.051 Uiso 1 1 calc R . .
C31 C 0.6513(5) 0.8419(6) 0.4245(3) 0.0382(16) Uani 1 1 d . . .
H31A H 0.6580 0.7880 0.4672 0.046 Uiso 1 1 calc R . .
H31B H 0.6970 0.7929 0.3874 0.046 Uiso 1 1 calc R . .
C32 C 0.2999(11) 0.4043(10) 0.3743(4) 0.140(5) Uani 1 1 d . . .
H32A H 0.2787 0.4607 0.4120 0.168 Uiso 1 1 calc R . .
H32B H 0.3852 0.3539 0.3819 0.168 Uiso 1 1 calc R . .
C33 C 0.2217(6) 0.3251(7) 0.3798(3) 0.054(2) Uani 1 1 d . . .
H33A H 0.1468 0.3598 0.4071 0.065 Uiso 1 1 calc R . .
H33B H 0.2640 0.2430 0.4005 0.065 Uiso 1 1 calc R . .
C34 C 0.1912(7) 0.3191(7) 0.3043(3) 0.065(2) Uani 1 1 d . . .
H34A H 0.2252 0.2350 0.2888 0.078 Uiso 1 1 calc R . .
H34B H 0.1012 0.3430 0.2974 0.078 Uiso 1 1 calc R . .
C35 C 0.2503(7) 0.4079(7) 0.2666(4) 0.070(2) Uani 1 1 d . . .
H35A H 0.3175 0.3638 0.2368 0.084 Uiso 1 1 calc R . .
H35B H 0.1892 0.4672 0.2374 0.084 Uiso 1 1 calc R . .
C36 C 0.3351(6) 0.6248(7) 0.1403(3) 0.058(2) Uani 1 1 d . . .
H36A H 0.3716 0.5473 0.1677 0.070 Uiso 1 1 calc R . .
H36B H 0.3777 0.6872 0.1522 0.070 Uiso 1 1 calc R . .
C37 C 0.3530(6) 0.6048(7) 0.0703(4) 0.072(2) Uani 1 1 d . . .
H37A H 0.3737 0.5156 0.0630 0.087 Uiso 1 1 calc R . .
H37B H 0.4203 0.6394 0.0511 0.087 Uiso 1 1 calc R . .
C38 C 0.2319(6) 0.6701(7) 0.0372(3) 0.070(2) Uani 1 1 d . . .
H38A H 0.1937 0.6113 0.0165 0.084 Uiso 1 1 calc R . .
H38B H 0.2428 0.7333 0.0015 0.084 Uiso 1 1 calc R . .
C39 C 0.1552(6) 0.7288(7) 0.0975(3) 0.061(2) Uani 1 1 d . . .
H39A H 0.1544 0.8169 0.0975 0.073 Uiso 1 1 calc R . .
H39B H 0.0694 0.7223 0.0944 0.073 Uiso 1 1 calc R . .

loop_
   _atom_site_aniso_label
   _atom_site_aniso_U_11
   _atom_site_aniso_U_22
   _atom_site_aniso_U_33
   _atom_site_aniso_U_23
   _atom_site_aniso_U_13
   _atom_site_aniso_U_12
V1 0.0163(5) 0.0181(5) 0.0169(5) -0.0027(4) 0.0004(4) -0.0048(4)
N1 0.024(2) 0.025(3) 0.021(2) -0.007(2) 0.0010(19) -0.005(2)
N2 0.028(3) 0.034(3) 0.029(3) -0.002(2) -0.004(2) -0.006(2)
N3 0.019(2) 0.020(3) 0.034(3) 0.004(2) 0.008(2) -0.002(2)
N4 0.023(2) 0.024(3) 0.036(3) -0.003(2) -0.001(2) -0.004(2)
N5 0.021(2) 0.025(3) 0.027(2) 0.000(2) 0.000(2) -0.007(2)
N6 0.040(3) 0.028(3) 0.020(2) -0.003(2) 0.002(2) -0.015(2)
O1 0.029(2) 0.046(3) 0.034(2) -0.008(2) -0.0021(18) -0.015(2)
O2 0.081(3) 0.038(3) 0.056(3) -0.001(2) -0.013(3) -0.034(3)
O3 0.046(3) 0.047(3) 0.029(2) -0.009(2) 0.005(2) 0.000(2)
P1 0.0156(7) 0.0170(8) 0.0215(7) -0.0016(6) 0.0018(6) -0.0038(6)
S1 0.0180(7) 0.0229(8) 0.0314(8) 0.0067(7) 0.0066(6) -0.0002(6)
S2 0.0230(7) 0.0228(8) 0.0227(7) -0.0056(6) -0.0025(6) -0.0002(6)
S3 0.0253(7) 0.0252(8) 0.0170(7) -0.0027(6) -0.0007(6) -0.0125(6)
Si1 0.0192(8) 0.0280(10) 0.0224(8) -0.0002(7) 0.0037(6) -0.0073(7)
Si2 0.0285(9) 0.0200(9) 0.0300(9) -0.0033(7) 0.0077(7) -0.0030(7)
Si3 0.0281(9) 0.0212(9) 0.0263(8) -0.0003(7) -0.0002(7) -0.0084(7)
C1 0.023(3) 0.032(4) 0.040(3) 0.010(3) 0.006(3) -0.006(3)
C2 0.021(3) 0.036(4) 0.032(3) 0.002(3) 0.000(2) -0.006(3)
C3 0.027(3) 0.033(4) 0.017(3) -0.012(3) 0.003(2) -0.010(3)
C4 0.022(3) 0.020(3) 0.027(3) 0.006(3) 0.004(2) -0.007(3)
C5 0.023(3) 0.028(4) 0.035(3) 0.011(3) 0.009(3) -0.009(3)
C6 0.026(3) 0.019(3) 0.039(3) 0.015(3) 0.005(3) 0.000(3)
C7 0.021(3) 0.020(3) 0.034(3) 0.002(3) -0.001(2) -0.001(3)
C8 0.020(3) 0.020(3) 0.021(3) -0.001(2) 0.007(2) -0.007(2)
C9 0.021(3) 0.017(3) 0.023(3) 0.002(2) 0.009(2) -0.001(2)
C10 0.041(4) 0.025(4) 0.038(3) -0.003(3) 0.014(3) -0.002(3)
C11 0.042(4) 0.030(4) 0.032(3) -0.003(3) 0.004(3) -0.002(3)
C12 0.045(4) 0.044(4) 0.038(4) -0.020(3) 0.004(3) -0.020(3)
C13 0.022(3) 0.015(3) 0.030(3) 0.005(2) 0.011(2) -0.008(2)
C14 0.020(3) 0.018(3) 0.029(3) -0.004(3) 0.004(2) -0.001(2)
C15 0.019(3) 0.026(4) 0.034(3) 0.010(3) 0.000(3) -0.001(3)
C16 0.022(3) 0.021(3) 0.025(3) -0.001(2) -0.002(2) -0.008(3)
C17 0.017(3) 0.021(3) 0.024(3) 0.003(2) 0.009(2) -0.006(2)
C18 0.013(3) 0.018(3) 0.030(3) 0.004(2) 0.004(2) -0.005(2)
C19 0.032(3) 0.034(4) 0.031(3) -0.005(3) 0.003(3) -0.015(3)
C20 0.050(4) 0.027(4) 0.033(3) -0.005(3) -0.007(3) -0.006(3)
C21 0.038(4) 0.028(4) 0.048(4) 0.006(3) 0.003(3) -0.009(3)
C22 0.017(3) 0.020(3) 0.024(3) -0.003(2) -0.001(2) -0.002(2)
C23 0.024(3) 0.022(3) 0.019(3) -0.010(2) -0.001(2) -0.003(3)
C24 0.026(2) 0.023(2) 0.0160(19) -0.0027(16) 0.0002(16) -0.0076(18)
C25 0.026(2) 0.023(2) 0.0160(19) -0.0027(16) 0.0002(16) -0.0076(18)
C26 0.009(2) 0.017(3) 0.028(3) 0.006(2) 0.006(2) 0.004(2)
C27 0.012(3) 0.021(3) 0.020(3) 0.000(2) 0.003(2) 0.001(2)
C28 0.043(4) 0.031(4) 0.031(3) -0.009(3) -0.002(3) -0.014(3)
C29 0.031(3) 0.049(5) 0.029(3) -0.008(3) -0.001(3) -0.004(3)
C30 0.029(3) 0.042(4) 0.057(4) 0.005(3) 0.001(3) -0.013(3)
C31 0.036(4) 0.034(4) 0.046(4) -0.001(3) 0.003(3) -0.012(3)
C32 0.245(13) 0.155(12) 0.075(7) 0.000(7) -0.019(8) -0.154(11)
C33 0.045(4) 0.065(6) 0.060(5) -0.002(4) -0.001(4) -0.027(4)
C34 0.084(5) 0.088(7) 0.045(4) -0.018(4) 0.010(4) -0.060(5)
C35 0.076(5) 0.059(6) 0.082(6) 0.013(5) -0.013(5) -0.034(5)
C36 0.035(4) 0.083(6) 0.053(5) 0.009(4) -0.008(4) -0.009(4)
C37 0.054(5) 0.065(6) 0.081(6) 0.008(5) 0.040(4) 0.008(4)
C38 0.068(5) 0.084(7) 0.042(4) -0.003(4) 0.004(4) 0.007(5)
C39 0.050(4) 0.071(6) 0.045(4) 0.004(4) -0.013(4) 0.012(4)

_geom_special_details
;
   All esds (except the esd in the dihedral angle between two l.s. planes)
   are estimated using the full covariance matrix.  The cell esds are taken
   into account individually in the estimation of esds in distances, angles
   and torsion angles; correlations between esds in cell parameters are only
   used when they are defined by crystal symmetry.  An approximate (isotropic)
   treatment of cell esds is used for estimating esds involving l.s. planes.
;

loop_
   _geom_bond_atom_site_label_1
   _geom_bond_atom_site_label_2
   _geom_bond_distance
   _geom_bond_site_symmetry_2
   _geom_bond_publ_flag
V1 N3 2.215(4) . ?
V1 N1 2.232(4) . ?
V1 N5 2.229(4) . ?
V1 P1 2.3971(15) . ?
V1 S3 2.4939(15) . ?
V1 S2 2.5041(16) . ?
V1 S1 2.5079(15) . ?
N1 N2 1.433(5) . ?
N3 N4 1.476(5) . ?
N5 N6 1.456(5) . ?
O1 C31 1.416(6) . ?
O1 C28 1.441(6) . ?
O2 C32 1.328(9) . ?
O2 C35 1.441(8) . ?
O3 C39 1.388(6) . ?
O3 C36 1.403(6) . ?
P1 C26 1.807(5) . ?
P1 C8 1.820(5) . ?
P1 C17 1.817(5) . ?
S1 C9 1.769(5) . ?
S2 C18 1.790(5) . ?
S3 C27 1.788(5) . ?
Si1 C1 1.820(5) . ?
Si1 C3 1.855(5) . ?
Si1 C2 1.873(5) . ?
Si1 C4 1.882(5) . ?
Si2 C10 1.868(5) . ?
Si2 C11 1.871(5) . ?
Si2 C12 1.873(5) . ?
Si2 C13 1.885(5) . ?
Si3 C21 1.861(6) . ?
Si3 C20 1.861(5) . ?
Si3 C19 1.871(5) . ?
Si3 C22 1.897(5) . ?
C4 C5 1.394(7) . ?
C4 C9 1.424(6) . ?
C5 C6 1.382(6) . ?
C6 C7 1.381(7) . ?
C7 C8 1.390(7) . ?
C8 C9 1.406(6) . ?
C13 C14 1.424(6) . ?
C13 C18 1.443(7) . ?
C14 C15 1.364(7) . ?
C15 C16 1.397(7) . ?
C16 C17 1.399(6) . ?
C17 C18 1.367(7) . ?
C22 C27 1.371(7) . ?
C22 C23 1.445(6) . ?
C23 C24 1.384(6) . ?
C24 C25 1.405(6) . ?
C25 C26 1.396(6) . ?
C26 C27 1.409(6) . ?
C28 C29 1.523(7) . ?
C29 C30 1.536(8) . ?
C30 C31 1.540(7) . ?
C32 C33 1.401(9) . ?
C33 C34 1.533(8) . ?
C34 C35 1.480(8) . ?
C36 C37 1.400(8) . ?
C37 C38 1.512(9) . ?
C38 C39 1.523(8) . ?

loop_
   _geom_angle_atom_site_label_1
   _geom_angle_atom_site_label_2
   _geom_angle_atom_site_label_3
   _geom_angle
   _geom_angle_site_symmetry_1
   _geom_angle_site_symmetry_3
   _geom_angle_publ_flag
N3 V1 N1 84.12(15) . . ?
N3 V1 N5 82.92(15) . . ?
N1 V1 N5 80.27(14) . . ?
N3 V1 P1 125.23(12) . . ?
N1 V1 P1 132.18(12) . . ?
N5 V1 P1 133.95(11) . . ?
N3 V1 S3 82.32(11) . . ?
N1 V1 S3 154.70(12) . . ?
N5 V1 S3 76.94(11) . . ?
P1 V1 S3 72.75(5) . . ?
N3 V1 S2 159.49(11) . . ?
N1 V1 S2 80.98(11) . . ?
N5 V1 S2 80.74(12) . . ?
P1 V1 S2 75.27(5) . . ?
S3 V1 S2 105.81(5) . . ?
N3 V1 S1 77.42(11) . . ?
N1 V1 S1 79.08(10) . . ?
N5 V1 S1 152.72(11) . . ?
P1 V1 S1 73.31(5) . . ?
S3 V1 S1 118.27(5) . . ?
S2 V1 S1 113.16(6) . . ?
N2 N1 V1 118.1(3) . . ?
N4 N3 V1 118.3(3) . . ?
N6 N5 V1 120.2(3) . . ?
C31 O1 C28 106.5(4) . . ?
C32 O2 C35 104.2(6) . . ?
C39 O3 C36 105.1(4) . . ?
C26 P1 C8 105.3(2) . . ?
C26 P1 C17 107.2(2) . . ?
C8 P1 C17 104.6(2) . . ?
C26 P1 V1 111.74(17) . . ?
C8 P1 V1 114.75(17) . . ?
C17 P1 V1 112.59(16) . . ?
C9 S1 V1 111.40(16) . . ?
C18 S2 V1 109.35(18) . . ?
C27 S3 V1 109.09(17) . . ?
C1 Si1 C3 109.4(3) . . ?
C1 Si1 C2 107.9(2) . . ?
C3 Si1 C2 109.2(2) . . ?
C1 Si1 C4 113.7(2) . . ?
C3 Si1 C4 109.0(2) . . ?
C2 Si1 C4 107.5(2) . . ?
C10 Si2 C11 108.1(2) . . ?
C10 Si2 C12 107.1(3) . . ?
C11 Si2 C12 109.5(3) . . ?
C10 Si2 C13 107.9(2) . . ?
C11 Si2 C13 113.3(2) . . ?
C12 Si2 C13 110.8(2) . . ?
C21 Si3 C20 109.1(3) . . ?
C21 Si3 C19 108.3(2) . . ?
C20 Si3 C19 110.3(2) . . ?
C21 Si3 C22 108.9(2) . . ?
C20 Si3 C22 110.6(2) . . ?
C19 Si3 C22 109.5(2) . . ?
C5 C4 C9 116.0(5) . . ?
C5 C4 Si1 120.7(4) . . ?
C9 C4 Si1 123.2(4) . . ?
C6 C5 C4 123.7(5) . . ?
C5 C6 C7 119.8(5) . . ?
C8 C7 C6 119.1(5) . . ?
C7 C8 C9 121.1(4) . . ?
C7 C8 P1 126.0(4) . . ?
C9 C8 P1 112.9(4) . . ?
C8 C9 C4 120.3(4) . . ?
C8 C9 S1 117.4(4) . . ?
C4 C9 S1 122.4(4) . . ?
C14 C13 C18 113.5(4) . . ?
C14 C13 Si2 121.4(4) . . ?
C18 C13 Si2 125.1(4) . . ?
C15 C14 C13 124.8(5) . . ?
C14 C15 C16 120.2(5) . . ?
C17 C16 C15 117.0(5) . . ?
C18 C17 C16 123.2(5) . . ?
C18 C17 P1 114.3(4) . . ?
C16 C17 P1 122.5(4) . . ?
C17 C18 C13 121.0(5) . . ?
C17 C18 S2 119.2(4) . . ?
C13 C18 S2 119.7(4) . . ?
C27 C22 C23 117.6(5) . . ?
C27 C22 Si3 124.9(4) . . ?
C23 C22 Si3 117.5(4) . . ?
C24 C23 C22 120.9(5) . . ?
C23 C24 C25 120.1(5) . . ?
C26 C25 C24 119.5(5) . . ?
C25 C26 C27 120.0(5) . . ?
C25 C26 P1 126.7(4) . . ?
C27 C26 P1 113.3(4) . . ?
C22 C27 C26 121.9(5) . . ?
C22 C27 S3 122.4(4) . . ?
C26 C27 S3 115.8(4) . . ?
O1 C28 C29 102.7(4) . . ?
C28 C29 C30 102.5(5) . . ?
C29 C30 C31 103.4(5) . . ?
O1 C31 C30 107.0(5) . . ?
O2 C32 C33 117.4(8) . . ?
C32 C33 C34 101.4(6) . . ?
C35 C34 C33 104.5(5) . . ?
O2 C35 C34 108.6(6) . . ?
O3 C36 C37 111.1(5) . . ?
C36 C37 C38 105.2(5) . . ?
C37 C38 C39 102.7(5) . . ?
O3 C39 C38 106.8(5) . . ?

_diffrn_measured_fraction_theta_max    0.960
_diffrn_reflns_theta_full              27.53
_diffrn_measured_fraction_theta_full   0.960
_refine_diff_density_max    0.957
_refine_diff_density_min   -0.707
_refine_diff_density_rms    0.102

#===END

#===================================================================
data_hsu3
#===================================================================

# 1. SUBMISSION DETAILS

_publ_contact_author_name     ' Professor Hua-Fen Hsu'
_publ_contact_author_address
;
Department of Chemistry
National Cheng Kung University
Tainan 701
Taiwan
;
_publ_contact_author_email     konopka@mail.ncku.edu.tw
_publ_contact_author_fax     '886-6-2757575 ext 65336'
_publ_contact_author_phone     '886-6-2740552'
_publ_requested_journal           'Inorganic Chemistry'
_publ_requested_coeditor_name   ?
_publ_contact_letter
;
September 10, 2001

Please consider this CIF submission for publication in Inorganic Chemistry.
All authors have seen and approved of this submission.

Hua-Fen Hsu
;

#======================================================================

# 2. PROCESSING SUMMARY (IUCr Office Use Only)

_journal_date_recd_electronic     ?

_journal_date_to_coeditor         ?
_journal_date_from_coeditor       ?
_journal_date_accepted            ?

_journal_date_printers_first      ?
_journal_date_printers_final      ?
_journal_date_proofs_out          ?
_journal_date_proofs_in           ?

_journal_coeditor_name            ?
_journal_coeditor_code            ?
_journal_coeditor_notes
; ?
;

_journal_techeditor_code          ?
_journal_techeditor_notes
; ?
;

_journal_coden_ASTM               ?
_journal_name_full                ?
_journal_year                     ?
_journal_volume                   ?
_journal_issue                    ?
_journal_page_first               ?
_journal_page_last                ?

_journal_suppl_publ_number        ?
_journal_suppl_publ_pages         ?

#=======================================================================

# 3. TITLE AND AUTHOR LIST

_publ_section_title
;
The First Example of a Seven-coordinate Vanadium(III) Thiolate
Complex Containing the Hydrazine Molecule, an Intermediate of
Nitrogen Fixation
;
loop_
      _publ_author_name
      _publ_author_address
      'Hua-Fen Hsu'
;
Department of Chemistry
National Cheng Kung University
Tainan, 701
Taiwan
;
      'Wei-Cheng Chu'
;
Department of Chemistry
National Cheng Kung University
Tainan, 701
Taiwan
;
      'Chen-Hsiung Hung'
;
Department of Chemistry
National Changhua University of Education
Changhua
Taiwan
;
      'Ju-Hsiou Liao'
;
Department of Chemistry
National Chung Cheng University
160 San-Hsing, Min-Hsiung, Chia-Yi 621
Taiwan
;

#=======================================================================

_audit_creation_method            SHELXL-97
_chemical_name_systematic
;
   ?
;
_chemical_name_common             V[P(C6H4-2-S)3][1-Me-Im]
_chemical_melting_point           ?
_chemical_formula_moiety          ?
_chemical_formula_sum
   'C22 H18 N2 P S3 V'
_chemical_formula_weight          488.47

loop_
   _atom_type_symbol
   _atom_type_description
   _atom_type_scat_dispersion_real
   _atom_type_scat_dispersion_imag
   _atom_type_scat_source
   'C'  'C'   0.0033   0.0016
   'International Tables Vol C Tables 4.2.6.8 and 6.1.1.4'
   'H'  'H'   0.0000   0.0000
   'International Tables Vol C Tables 4.2.6.8 and 6.1.1.4'
   'N'  'N'   0.0061   0.0033
   'International Tables Vol C Tables 4.2.6.8 and 6.1.1.4'
   'P'  'P'   0.1023   0.0942
   'International Tables Vol C Tables 4.2.6.8 and 6.1.1.4'
   'S'  'S'   0.1246   0.1234
   'International Tables Vol C Tables 4.2.6.8 and 6.1.1.4'
   'V'  'V'   0.3005   0.5294
   'International Tables Vol C Tables 4.2.6.8 and 6.1.1.4'

_symmetry_cell_setting            'orthorhombic'
_symmetry_space_group_name_H-M    'P212121'

loop_
   _symmetry_equiv_pos_as_xyz
   'x, y, z'
   '-x+1/2, -y, z+1/2'
   '-x, y+1/2, -z+1/2'
   'x+1/2, -y+1/2, -z'

_cell_length_a                    10.2797(19)
_cell_length_b                    12.886(2)
_cell_length_c                    16.690(3)
_cell_angle_alpha                 90.00
_cell_angle_beta                  90.00
_cell_angle_gamma                 90.00
_cell_volume                      2210.8(7)
_cell_formula_units_Z             4
_cell_measurement_temperature     298
_cell_measurement_reflns_used     72
_cell_measurement_theta_min       -23.529
_cell_measurement_theta_max       23.529

_exptl_crystal_description        'plate'
_exptl_crystal_colour             'dark green'
_exptl_crystal_size_max           0.21
_exptl_crystal_size_mid           0.21
_exptl_crystal_size_min           0.11
_exptl_crystal_density_meas       ?
_exptl_crystal_density_diffrn     1.468
_exptl_crystal_density_method     'not measured'
_exptl_crystal_F_000              1000
_exptl_absorpt_coefficient_mu     0.816
_exptl_absorpt_correction_type    'Empirical'
_exptl_absorpt_correction_T_min   0.8473
_exptl_absorpt_correction_T_max   0.9156
_exptl_absorpt_process_details    'SADABS'

_exptl_special_details
;
   ?
;

_diffrn_ambient_temperature       298
_diffrn_radiation_wavelength      0.71073
_diffrn_radiation_type            MoK\a
_diffrn_radiation_source          'fine-focus sealed tube'
_diffrn_radiation_monochromator   graphite
_diffrn_measurement_device_type   'Bruker Smart Apex'
_diffrn_measurement_method        'phi-Omega scan'
_diffrn_detector_area_resol_mean  ?
_diffrn_standards_number          ?
_diffrn_standards_interval_count  ?
_diffrn_standards_interval_time   ?
_diffrn_standards_decay_%         ?
_diffrn_reflns_number             13328
_diffrn_reflns_av_R_equivalents   0.0746
_diffrn_reflns_av_sigmaI/netI     0.1083
_diffrn_reflns_limit_h_min        -10
_diffrn_reflns_limit_h_max        13
_diffrn_reflns_limit_k_min        -13
_diffrn_reflns_limit_k_max        17
_diffrn_reflns_limit_l_min        -21
_diffrn_reflns_limit_l_max        20
_diffrn_reflns_theta_min          2.00
_diffrn_reflns_theta_max          28.41
_reflns_number_total              5185
_reflns_number_gt                 2861
_reflns_threshold_expression      >2sigma(I)

_computing_data_collection        'BRUKER SMART'
_computing_cell_refinement        'BRUKER SMART'
_computing_data_reduction         'BRUKER SAINT'
_computing_structure_solution     'SHELXS-97 (Sheldrick, 1990)'
_computing_structure_refinement   'SHELXL-97 (Sheldrick, 1997)'
_computing_molecular_graphics     'Ortep-3'
_computing_publication_material   'Wingx publication routines (Farrugia, 1999)'

_refine_special_details
;
   Refinement of F^2^ against ALL reflections.  The weighted R-factor wR and
   goodness of fit S are based on F^2^, conventional R-factors R are based
   on F, with F set to zero for negative F^2^. The threshold expression of
   F^2^ > 2sigma(F^2^) is used only for calculating R-factors(gt) etc. and is
   not relevant to the choice of reflections for refinement.  R-factors based
   on F^2^ are statistically about twice as large as those based on F, and R-
   factors based on ALL data will be even larger.
;

_refine_ls_structure_factor_coef  Fsqd
_refine_ls_matrix_type            full
_refine_ls_weighting_scheme       calc
_refine_ls_weighting_details
   'calc w=1/[\s^2^(Fo^2^)+(0.0325P)^2^+0.0000P] where P=(Fo^2^+2Fc^2^)/3'
_atom_sites_solution_primary      direct
_atom_sites_solution_secondary    difmap
_atom_sites_solution_hydrogens    geom
_refine_ls_hydrogen_treatment     mixed
_refine_ls_extinction_method      none
_refine_ls_extinction_coef        ?
_refine_ls_abs_structure_details
   'Flack H D (1983), Acta Cryst. A39, 876-881'
_refine_ls_abs_structure_Flack    0.04(3)
_refine_ls_number_reflns          5185
_refine
